# Supplementary material
Source: PubMed Central journal article supplement (PMC3386063)
Supplement: 1200554109_pnas.201200554SI.pdf [file 1200554109_pnas.201200554SI.pdf]

# Supporting Information

Mengozzi et al. 10.1073/pnas.1200554109

## SI Methods

**Generation of Lentivectors Expressing Erythropoietin Receptor.** A DNA sequence encoding mouse erythropoietin receptor (EPOR) was amplified by PCR from mouse thymic cDNA using Platinum *Pfx* DNA Polymerase (Promega) at 1 mM MgSO<sub>4</sub>. The forward primer 5'ATGGACAAACTCAGGGTG and the reverse primer 5'CTAGGAGCAGGCCACATA were used, and 40 amplification cycles of 94 °C for 15 s, 60 °C for 30 s, and 68 °C for 1 min 45 s were completed. The PCR product was treated with Taq polymerase (Promega) before subcloning in pCR2.1 (Invitrogen). A DNA fragment encoding EPOR for subcloning in a lentivector was amplified by PCR from one of the resulting clones. In the PCR product, the coding sequence was flanked at the 5' end with a SpeI restriction site, which was copied from the multiple cloning sequence of pCR2.1 because the M13 reverse primer was used as a forward primer. At the 3' end of the coding sequence, the BstBI site (underlined) was incorporated by the reverse primer 5'CGTAGCTTCGAAGGAGCAGGCCACATAGC to facilitate subcloning in frame with the V5 epitope. Platinum *Pfx* DNA Polymerase (Promega) was used at 1 mM MgSO<sub>4</sub>, and 35 amplification cycles of 94 °C for 15 s, 50 °C for 30 s, and 68 °C for 1 min 45 s were completed. The PCR product was subcloned, between SpeI and BstBI sites, in the constitutive self-inactivating lentivector with the spleen focus-forming virus promoter (1) modified by us to include the V5 epitope, the mouse encephalomyocarditis internal ribosome entry site, and EGFP (2). Correct sequences of inserts were confirmed by DNA sequence analysis at the Genome Centre, Queen Mary University of London.

Production of lentivector particles, gene transfer, and cloning of B104 cells were performed as described previously (2).

**EPOR Expression and Activation in B104-EPOR Cells.** The expression of EPOR in transduced cells was detected as described for other V5-tagged recombinant proteins (2). Briefly, cells were lysed with the buffer containing 10 mM Tris (pH 7.4), 100 mM NaCl, 50 mM NaF, 0.1% SDS, 1% Triton-X 100 (all from VWR), 1 mM EDTA, 1 mM EGTA, 20 mM Na<sub>4</sub>P<sub>2</sub>O<sub>7</sub>, 2 mM Na<sub>2</sub>VO<sub>4</sub>, 0.5% sodium deoxycholate, 10% glycerol, and 1 mM PMSF (all from Sigma), and the protease inhibitor mixture (Calbiochem). Cell lysates were separated by PAGE in the presence of 5% β-mercaptoethanol. EPOR was detected by immunoblotting with the anti-V5 mouse monoclonal antibody (Invitrogen).

To determine EPOR activation in response to erythropoietin (EPO), EPOR-expressing B104 cells were cultured until 90% confluent in six-well plates, serum-starved for 4 h, and stimulated or mock-stimulated with 50 ng/mL of human recombinant EPO (Peprotec) for 15 or 30 min. Lysates of control and stimulated cells were immunoprecipitated with rabbit polyclonal anti-EPOR antibody (Santa Cruz Biotechnology) and immunoblotted with a mixture of the phosphotyrosine-specific mouse mAbs pY20 (Abcam) and 4G10 (Millipore), 1 mg/mL each (anti-pY). After stripping at low pH, the blots were reprobed with anti-V5. Immunoblots were developed as described (2) using HRP-conjugated F(ab')<sub>2</sub> fragment of rabbit anti-mouse IgG (Zymed Laboratories) as a secondary antibody.

1. Demaison C, et al. (2002) High-level transduction and gene expression in hematopoietic repopulating cells using a human immunodeficiency virus type 1-based lentiviral vector containing an internal spleen focus forming virus promoter. *Hum Gene Ther* 13:803–813.

2. Annenkov A, et al. (2011) A chimeric receptor of the insulin-like growth factor receptor type 1 (IGFR1) and a single chain antibody specific to myelin oligodendrocyte glycoprotein activates the IGF1R signalling cascade in CG4 oligodendrocyte progenitors. *Biochim Biophys Acta* 1813:1428–1437.

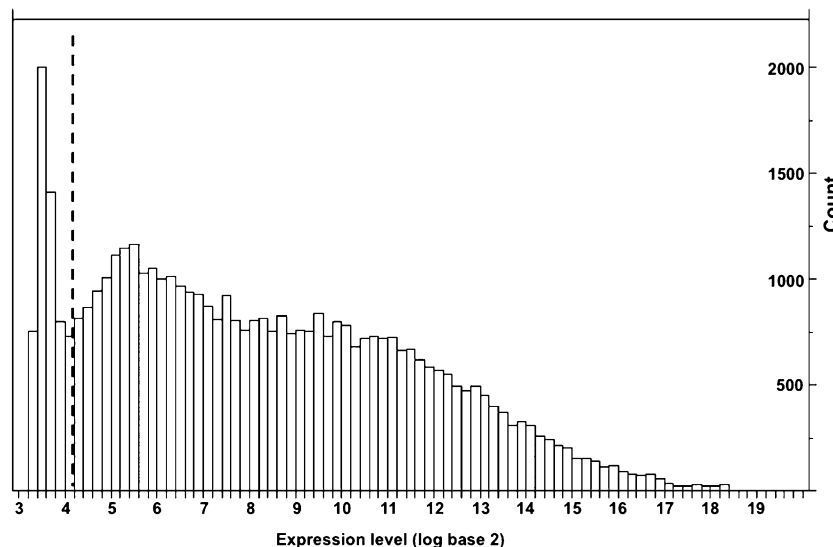

Fig. S1. Frequency distribution of expression data. The dashed vertical line shows the arbitrary threshold of 4.2 used to filter out low-expression transcripts.

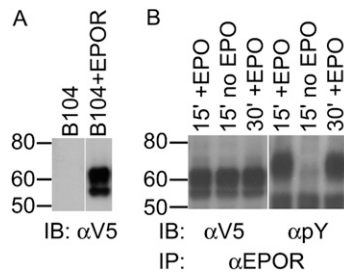

**Fig. S2.** Expression and activation of EPOR in B104 cells. (A) Untransduced B104 cells and the clone of EPOR-transduced B104 cells were lysed, and EPOR expression in cell lysates was determined by immunoblotting with anti-V5. (B) The clone of EPOR-expressing B104 cells was treated with EPO (50 ng/mL) for 15 or 30 min or was mock-stimulated for 15 min. EPOR was immunoprecipitated (IP) from cell lysates with anti-EPOR, separated by PAGE, and immunoblotted (IB) with anti-pY. The membranes were stripped and reprobed with anti-V5.

**Table S1. Transcripts significantly changed by EPO in ischemic cortex at 2 h and relative changes in ischemia versus sham**

| Gene symbol                 | Accession number   | Ischemia+EPO vs. ischemia |         | Ischemia vs. sham |         |
|-----------------------------|--------------------|---------------------------|---------|-------------------|---------|
|                             |                    | Fold change               | P value | Fold change       | P value |
| <b>Up-regulated</b>         |                    |                           |         |                   |         |
| XM_226521*                  | XM_226521          | 1.46                      | 0.0173  | -1.31             | 0.0395  |
| Olr792_predicted            | NM_001000378       | 1.45                      | 0.0037  | -0.64             | 0.0038  |
| BF565770*                   | BF565770           | 1.33                      | 0.0378  | ns                | —       |
| AI010145*                   | AI010145           | 1.15                      | 0.0119  | ns                | —       |
| TC533613*                   | TC533613           | 1.14                      | 0.0438  | -0.55             | 0.0493  |
| AA891571*                   | AA891571           | 1.11                      | 0.0324  | -1.28             | 0.0144  |
| CB762850*                   | CB762850           | 1.05                      | 0.0392  | -0.96             | 0.0488  |
| Cyp2a2                      | NM_012693          | 1.04                      | 0.0179  | ns                | —       |
| AI230744*                   | AI230744           | 0.90                      | 0.0395  | ns                | —       |
| AI599572*                   | AI599572           | 0.72                      | 0.0262  | ns                | —       |
| Jak3                        | NM_012855          | 0.59                      | 0.0278  | ns                | —       |
| <b>Down-regulated</b>       |                    |                           |         |                   |         |
| XM_226554*                  | XM_226554          | -2.04                     | 0.0012  | 1.44              | 0.0040  |
| Olr529_predicted            | NM_001000674       | -1.56                     | 0.0128  | ns                | —       |
| AI231805*                   | AI231805           | -1.53                     | 0.0054  | ns                | —       |
| Olr153_predicted            | NM_001000167       | -1.50                     | 0.0184  | ns                | —       |
| BE107503*                   | BE107503           | -1.38                     | 0.0253  | ns                | —       |
| LOC683790                   | XM_001067479       | -1.33                     | 0.0008  | 0.92              | 0.0027  |
| RGD1560913_predicted        | XM_574627          | -1.29                     | 0.0206  | 1.32              | 0.0107  |
| BE117594*                   | BE117594           | -1.14                     | 0.0435  | ns                | —       |
| BQ201357*                   | BQ201357           | -1.03                     | 0.0447  | ns                | —       |
| AA818700*                   | AA818700           | -0.93                     | 0.0165  | ns                | —       |
| AA858950*                   | AA858950           | -0.92                     | 0.0380  | ns                | —       |
| Aqp6                        | NM_022181          | -0.92                     | 0.0238  | ns                | —       |
| AI113235*                   | AI113235           | -0.89                     | 0.0345  | ns                | —       |
| LOC684560                   | XM_001070979       | -0.87                     | 0.0352  | ns                | —       |
| RGD1559517_predicted        | XM_227127          | -0.86                     | 0.0366  | 0.67              | 0.0392  |
| BG672648*                   | BG672648           | -0.85                     | 0.0308  | ns                | —       |
| A_44_P630635*               | A_44_P630635       | -0.85                     | 0.0270  | ns                | —       |
| BE105878*                   | BE105878           | -0.82                     | 0.0441  | 1.08              | 0.0019  |
| ENSRNOT00000038661          | ENSRNOT00000038661 | -0.81                     | 0.0341  | ns                | —       |
| Bmpr2 <sup>†</sup>          | XM_217409          | -0.79                     | 0.0040  | ns                | —       |
| BF567165                    | BF567165           | -0.76                     | 0.0273  | ns                | —       |
| AA900594*                   | AA900594           | -0.74                     | 0.0136  | ns                | —       |
| BE104341*                   | BE104341           | -0.70                     | 0.0424  | ns                | —       |
| RGD1561261_predicted        | XM_001053212       | -0.70                     | 0.0399  | ns                | —       |
| Kcnd3 <sup>†</sup>          | NM_031739          | -0.69                     | 0.0465  | ns                | —       |
| TC533561*                   | TC533561           | -0.68                     | 0.0014  | ns                | —       |
| Igf1 <sup>†</sup>           | NM_178866          | -0.67                     | 0.0283  | ns                | —       |
| TC562057*                   | TC562057           | -0.67                     | 0.0052  | ns                | —       |
| Odz3_predicted <sup>†</sup> | XM_224841          | -0.65                     | 0.0473  | ns                | —       |
| LOC685076 <sup>†</sup>      | XM_001062178       | -0.63                     | 0.0460  | ns                | —       |
| TC558054*                   | TC558054           | -0.62                     | 0.0037  | ns                | —       |
| BF545795*                   | BF545795           | -0.61                     | 0.0361  | ns                | —       |
| BQ200021*                   | BQ200021           | -0.59                     | 0.0473  | ns                | —       |

Fold change is expressed as log<sub>2</sub> ratio and is the average of triplicate samples. All transcripts changed more than 1.5-fold,  $P < 0.05$  in ischemia+EPO vs. ischemia are included, and the relative changes in ischemia vs. sham are reported. ns, not significant.

\*Unmapped probe IDs.

<sup>†</sup>Transcripts identified by different probes/replicates, of which only one probe/replicate changed significantly.

**Table S2. Transcripts significantly changed by EPO in ischemic cortex at 6 h and relative changes in ischemia versus sham**

| Gene symbol                       | Accession number   | Ischemia+EPO vs. ischemia |         | Ischemia vs. sham |         |
|-----------------------------------|--------------------|---------------------------|---------|-------------------|---------|
|                                   |                    | Fold change               | P value | Fold change       | P value |
| Up-regulated                      |                    |                           |         |                   |         |
| RGD1304775_predicted              | XM_237151          | 2.80                      | 0.0469  | ns                | —       |
| XM_344767*                        | XM_344767          | 2.76                      | 0.0183  | ns                | —       |
| XM_224708*                        | XM_224708          | 2.74                      | 0.0429  | ns                | —       |
| AA956764*                         | AA956764           | 2.60                      | 0.0029  | ns                | —       |
| CB547501*                         | CB547501           | 2.50                      | 0.0129  | ns                | —       |
| RGD1310265_predicted              | XM_001070727       | 2.38                      | 0.0423  | ns                | —       |
| Krt14                             | D63774             | 2.32                      | 0.0377  | ns                | —       |
| Slc10a1                           | NM_017047          | 2.28                      | 0.0273  | ns                | —       |
| LOC679379                         | XM_001055377       | 2.23                      | 0.0468  | ns                | —       |
| XM_576553*                        | XM_576553          | 2.19                      | 0.0035  | ns                | —       |
| ENSRNOT00000014809                | ENSRNOT00000014809 | 2.02                      | 0.0229  | ns                | —       |
| AI598863*                         | AI598863           | 1.96                      | 0.0483  | -1.25             | 0.0051  |
| AI599332*                         | AI599332           | 1.93                      | 0.0323  | ns                | —       |
| Ces5                              | XM_341636          | 1.62                      | 0.0479  | ns                | —       |
| RGD1563378_predicted              | XM_228994          | 1.60                      | 0.0342  | ns                | —       |
| Olr1461_predicted                 | NM_001000022       | 1.46                      | 0.0476  | ns                | —       |
| BE111679*                         | BE111679           | 1.33                      | 0.0210  | ns                | —       |
| BE101481*                         | BE101481           | 1.26                      | 0.0251  | ns                | —       |
| TC541788*                         | TC541788           | 1.22                      | 0.0341  | ns                | —       |
| BI288013*                         | BI288013           | 1.21                      | 0.0287  | ns                | —       |
| RGD1565310_predicted <sup>†</sup> | XM_343014          | 1.12                      | 0.0064  | ns                | —       |
| Bdnf                              | NM_012513          | 1.08                      | 0.0323  | 1.49              | 0.0026  |
| Bdnf                              | NM_012513          | 1.07                      | 0.0450  | 1.47              | 0.0048  |
| Bdnf                              | NM_012513          | 1.07                      | 0.0390  | 1.58              | 0.0049  |
| XM_342155*                        | XM_342155          | 1.05                      | 0.0276  | ns                | —       |
| Bdnf                              | NM_012513          | 1.05                      | 0.0483  | 1.49              | 0.0040  |
| Bdnf                              | NM_012513          | 1.02                      | 0.0419  | 1.54              | 0.0033  |
| Bdnf                              | NM_012513          | 1.02                      | 0.0405  | 1.50              | 0.0023  |
| TC531175*                         | TC531175           | 1.02                      | 0.0290  | -1.06             | 0.0119  |
| AW142999*                         | AW142999           | 1.01                      | 0.0400  | 2.38              | 0.0007  |
| Dusp5                             | NM_133578          | 1.01                      | 0.0333  | 1.42              | 0.0018  |
| AW142932*                         | AW142932           | 1.01                      | 0.0408  | 2.35              | 0.0003  |
| Egr2                              | NM_053633          | 1.01                      | 0.0077  | 1.42              | 0.0089  |
| Olr372_predicted                  | NM_001001048       | 1.00                      | 0.0153  | ns                | —       |
| TC530277*                         | TC530277           | 0.89                      | 0.0071  | 0.86              | 0.0180  |
| Arc                               | NM_019361          | 0.88                      | 0.0433  | 1.57              | 0.0008  |
| Arc                               | NM_019361          | 0.87                      | 0.0475  | 1.60              | 0.0003  |
| Arc                               | NM_019361          | 0.86                      | 0.0461  | 1.59              | 0.0004  |
| Arc                               | NM_019361          | 0.86                      | 0.0439  | 1.60              | 0.0006  |
| Fosl2                             | NM_012954          | 0.86                      | 0.0099  | ns                | —       |
| Mas1                              | NM_012757          | 0.85                      | 0.0188  | ns                | —       |
| Arc                               | NM_019361          | 0.85                      | 0.0439  | 1.59              | 0.0005  |
| Egr4                              | NM_019137          | 0.85                      | 0.0253  | 1.08              | 0.0066  |
| Arc                               | NM_019361          | 0.85                      | 0.0459  | 1.58              | 0.0001  |
| LOC684624                         | XM_001070871       | 0.84                      | 0.0472  | ns                | —       |
| Arc                               | NM_019361          | 0.84                      | 0.0396  | 1.61              | 0.0003  |
| BF281861*                         | BF281861           | 0.80                      | 0.0299  | ns                | —       |
| AABR03057977*                     | AABR03057977       | 0.80                      | 0.0449  | -0.87             | 0.0438  |
| TC532746*                         | TC532746           | 0.77                      | 0.0407  | -1.44             | 0.0045  |
| TC542653*                         | TC542653           | 0.77                      | 0.0003  | ns                | —       |
| RGD1565022_predicted <sup>†</sup> | XM_216007          | 0.76                      | 0.0287  | ns                | —       |
| TC547308*                         | TC547308           | 0.76                      | 0.0496  | ns                | —       |
| Rem2                              | NM_022685          | 0.75                      | 0.0183  | 1.29              | 0.0192  |
| AF050661*                         | AF050661           | 0.74                      | 0.0268  | ns                | —       |
| Olr1678_predicted                 | NM_001000893       | 0.73                      | 0.0395  | ns                | —       |
| TC549515*                         | TC549515           | 0.72                      | 0.0319  | ns                | —       |
| Prss1                             | NM_001003956       | 0.68                      | 0.0057  | ns                | —       |
| Nr4a3                             | NM_031628          | 0.68                      | 0.0152  | ns                | —       |
| AI137349*                         | AI137349           | 0.67                      | 0.0406  | ns                | —       |
| XM_224859                         | XM_224859          | 0.66                      | 0.0169  | ns                | —       |

Table S2. Cont.

| Gene symbol                       | Accession number | Ischemia+EPO vs. ischemia |         | Ischemia vs. sham |         |
|-----------------------------------|------------------|---------------------------|---------|-------------------|---------|
|                                   |                  | Fold change               | P value | Fold change       | P value |
| TC545861*                         | TC545861         | 0.65                      | 0.0175  | -0.69             | 0.0318  |
| Numb <sup>†</sup>                 | DQ336705         | 0.65                      | 0.0409  | ns                | —       |
| XM_344386*                        | XM_344386        | 0.65                      | 0.0040  | -1.02             | 0.0072  |
| TC549896*                         | TC549896         | 0.65                      | 0.0233  | -0.84             | 0.0182  |
| RGD1311223_predicted              | XM_345971        | 0.65                      | 0.0300  | ns                | —       |
| TC543180*                         | TC543180         | 0.65                      | 0.0373  | -0.73             | 0.0220  |
| TC522684*                         | TC522684         | 0.64                      | 0.0209  | -0.91             | 0.0018  |
| Nr4a3                             | DQ268830         | 0.64                      | 0.0040  | ns                | —       |
| Egr1                              | NM_012551        | 0.63                      | 0.0326  | ns                | —       |
| TC563722*                         | TC563722         | 0.63                      | 0.0340  | ns                | —       |
| Egr1                              | NM_012551        | 0.62                      | 0.0239  | ns                | —       |
| Ccl7                              | NM_001007612     | 0.62                      | 0.0195  | 2.65              | 0.0064  |
| Egr1                              | NM_012551        | 0.62                      | 0.0225  | ns                | —       |
| Cdkl3                             | NM_021772        | 0.61                      | 0.0274  | ns                | —       |
| Egr1                              | NM_012551        | 0.61                      | 0.0190  | ns                | —       |
| RGD1564664_predicted <sup>†</sup> | XM_575179        | 0.60                      | 0.0472  | 1.34              | 0.0007  |
| RGD1562685_predicted              | XM_231463        | 0.60                      | 0.0099  | ns                | —       |
| Egr1                              | NM_012551        | 0.60                      | 0.0267  | ns                | —       |
| Egr1                              | NM_012551        | 0.60                      | 0.0382  | ns                | —       |
| AI710695*                         | AI710695         | 0.60                      | 0.0491  | ns                | —       |
| AA875032*                         | AA875032         | 0.59                      | 0.0226  | 0.67              | 0.0057  |
| Egr1                              | NM_012551        | 0.59                      | 0.0326  | ns                | —       |
| Angptl4                           | NM_199115        | 0.59                      | 0.0285  | 1.02              | 0.0123  |
| TC567892*                         | TC567892         | 0.59                      | 0.0466  | ns                | —       |
| Ccl7                              | NM_001007612     | 0.58                      | 0.0298  | 2.84              | 0.0008  |
| Egr1                              | NM_012551        | 0.58                      | 0.0341  | ns                | —       |
| Down-regulated                    |                  |                           |         |                   |         |
| Olr750_predicted                  | NM_001000366     | -1.56                     | 0.0321  | ns                | —       |
| Atp7a                             | NM_052803        | -1.21                     | 0.0159  | ns                | —       |
| Trem1_predicted                   | XM_217336        | -1.03                     | 0.0243  | 1.67              | 0.0057  |
| Olr1630_predicted                 | NM_001000092     | -0.97                     | 0.0240  | ns                | —       |
| BM386916*                         | BM386916         | -0.96                     | 0.0173  | 0.64              | 0.0139  |
| BM384709*                         | BM384709         | -0.95                     | 0.0168  | ns                | —       |
| TC542144*                         | TC542144         | -0.94                     | 0.0194  | ns                | —       |
| RGD1307937                        | NM_001013877     | -0.82                     | 0.0265  | ns                | —       |
| AI385136*                         | AI385136         | -0.79                     | 0.0137  | ns                | —       |
| BI277534*                         | BI277534         | -0.78                     | 0.0381  | ns                | —       |
| RGD1310352                        | XM_220404        | -0.71                     | 0.0141  | ns                | —       |
| Ar <sup>†</sup>                   | NM_012502        | -0.71                     | 0.0234  | -1.13             | 0.0299  |
| Alg5 <sup>†</sup>                 | NM_001025407     | -0.69                     | 0.0074  | ns                | —       |
| AA925183*                         | AA925183         | -0.69                     | 0.0046  | ns                | —       |
| Zfp606                            | XM_218283        | -0.67                     | 0.0429  | ns                | —       |
| Tex15_predicted <sup>†</sup>      | XM_214365        | -0.66                     | 0.0258  | ns                | —       |
| Cxcl2                             | NM_053647        | -0.65                     | 0.0369  | 6.49              | 1.4E-07 |
| Cbl11_predicted <sup>†</sup>      | XM_001073155     | -0.61                     | 0.0488  | 0.64              | 0.0053  |
| LOC679115                         | XM_001054757     | -0.60                     | 0.0235  | ns                | —       |
| Olr1271 <sup>†</sup>              | NM_173300        | -0.60                     | 0.0260  | ns                | —       |
| RGD1310980_predicted              | XM_343381        | -0.60                     | 0.0358  | ns                | —       |
| LOC680443                         | XM_001057208     | -0.60                     | 0.0115  | ns                | —       |
| Rnf24_predicted                   | XM_342522        | -0.59                     | 0.0243  | ns                | —       |
| Crispld1_predicted                | XM_237258        | -0.59                     | 0.0491  | ns                | —       |

Fold change is expressed as log<sub>2</sub> ratio and is the average of triplicate samples. All transcripts changed more than 1.5-fold, P < 0.05 in ischemia+EPO vs. ischemia are included, and the relative changes in ischemia vs. sham are reported. The table includes replicates identifying the same genes. ns, not significant. \*Unmapped probe IDs.

<sup>†</sup>Transcripts identified by different probes/replicates, of which only one probe/replicate significantly changed. These transcripts were not included in Table 2.

## Other Supporting Information Files

[Dataset S1 \(XLSX\)](#)

[Dataset S2 \(XLSX\)](#)
